# Supplementary material for: Morphological and genomic comparisons of Hawaiian and Japanese Black-footed Albatrosses (Phoebastria nigripes) using double digest RADseq: implications for conservation
Source: PubMed Central journal article supplement (PMC4516419; doi:10.1111/eva.12274), 2015-06-13
Supplement: eva0008-0662-sd1.pdf [file eva0008-0662-sd1.pdf]

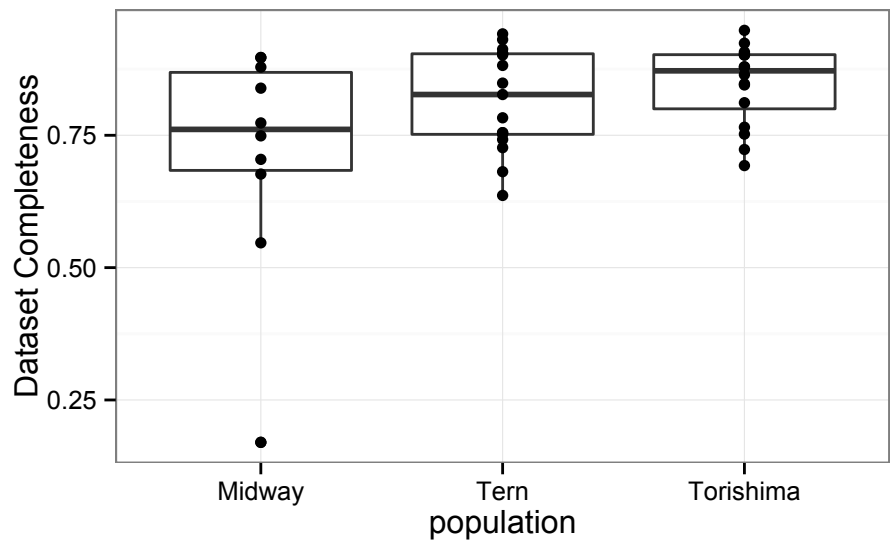

Supplementary Figure 1.
